# Supplementary material
Source: publisher figshare collection journal article supplement (https://acs.figshare.com/ndownloader/files/4262074)
Supplement: Supplementary file 1 [file 4262074]

## Supporting Information

### Transformative 2-Dimensional Layered Nanocrystals

*Sohee Jeong,<sup>†</sup> Jae Hyo Han,<sup>†</sup> Jung-tak Jang,<sup>†</sup> Jung-wook Seo,<sup>†</sup> Jin-Gyu Kim,<sup>‡</sup> and Jinwoo Cheon<sup>\*,†</sup>*

<sup>†</sup>Department of Chemistry, Yonsei University, Seoul 120–749, Korea

<sup>‡</sup>Division of Electron Microscopic Research, Korea Basic Science Institute, Daejeon 305–333, Korea

#### Methods

**Synthesis of TiS<sub>2</sub> nanodiscs.** Titanium (IV) chloride (160  $\mu$ l, 1.5 mmol) was mixed with oleylamine (3 g, 11.2 mmol) in a round-bottom flask under argon atmosphere and the mixture was heated at 300 °C. Subsequently, carbon disulfide (0.3 ml, 1.2 mmol) was injected into the flask at the same temperature. After 1 hr, reaction mixture was treated with hexane (2 ml) and methanol (3 ml) to isolate black TiS<sub>2</sub> nanodiscs (80 mg).

**Synthesis of Cu<sub>2</sub>S toroid nanocrystals:** TiS<sub>2</sub> nanodiscs (57 mg, 0.53 mmol) were mixed with copper (II) chloride (CuCl<sub>2</sub>) (0.53, 1.06, 2.12 mmol) in a round-bottom flask containing oleylamine (3 g, 11.2 mmol). The reaction mixture was heated to 200 °C for 30 min and then was cooled to room temperature. During the course of the reaction, the initial black-colored solution gradually became dark brown. Then hexane (2 ml) and methanol (3 ml) were used to precipitate brown Cu<sub>2</sub>S (70 mg). Intermediate structures containing TiS<sub>2</sub>-Cu<sub>2</sub>S were obtained by varying the relative molar ratio of Cu ion and TiS<sub>2</sub> nanodiscs or varying the reaction temperature as described in the main text.

**Synthesis of TiS<sub>2</sub>-Ag<sub>2</sub>S hetero-structure nanocrystals.** TiS<sub>2</sub> nanodiscs (10 mg, 0.08 mmol) were dispersed in trioctylphosphine (5 g, 11.2 mmol) and silver nitrate (AgNO<sub>3</sub>) (135 mg, 0.8 mmol) was added. Then, the mixture was heated to 70 °C and maintained for 1 h under the argon atmosphere with vigorous stirring. The solution was cooled to room temperature and the product was washed and precipitated by centrifugation at 3000 rpm for 15 min.

**Synthesis of TiS<sub>2</sub>-MnS hetero-structure nanocrystals.** TiS<sub>2</sub> nanodiscs (10 mg, 0.08 mmol) were dispersed in oleylamine (5 g, 18.6 mmol) and manganese (II) chloride (MnCl<sub>2</sub>) (100 mg, 0.8 mmol) was added in a round-bottom flask. The reaction mixture was heated to 100 °C for 3 h and then was cooled to room temperature. During the course of the reaction, the initial

black-colored solution gradually became purple. The solution was cooled to room temperature and the product was washed and precipitated by centrifugation at 3000 rpm for 15 min.

**Synthesis of CdS nanocrystals.**  $\text{TiS}_2$  nanodiscs (10 mg, 0.08 mmol) were dispersed in oleylamine (5 g, 18.6 mmol) and cadmium (II) chloride ( $\text{CdCl}_2$ ) (146 mg, 0.8 mmol) was added in a round-bottom flask. The reaction mixture was heated to 80 °C for 5 h and then was cooled to room temperature. During the course of the reaction, the initial black-colored solution gradually became green. The solution was cooled to room temperature and the product was washed and precipitated by centrifugation at 3000 rpm for 15 min.

### Characterizations

TEM analyses were performed using a JEM 2100 at 200 kV and JEM-ARM1300S at 1250 kV. TEM samples were prepared by dropping nanocrystals suspended in a toluene solution onto a carbon-coated molybdenum grid or ultra thin copper grid. EELS analysis was performed using a post-column energy filter (Gatan HV-GIF2000). Power X-ray diffraction measurements were conducted using a Rigaku D/MAX-RB equipped with a graphite-monochromated  $\text{Cu}_{\text{K}\alpha}$  radiation source (40 kV, 120 mA).

### Elemental mapping of toroidal $\text{Cu}_2\text{S}$ nanocrystal.

Electron energy loss spectroscopy (EELS) analysis of toroid nanocrystal shows copper and sulfur atoms are the constitutive elements.

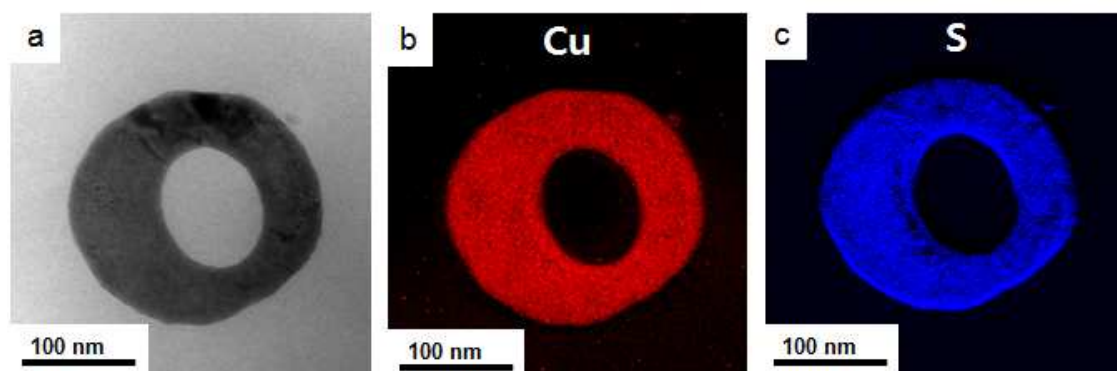

**Figure S1.** a) Zero-loss filtered TEM image. b) Copper and (c) sulfur signals are color-coded as red and blue.

**TEM images of Time dependent chemical transformation of  $\text{TiS}_2$  nanodiscs upon reaction with Cu ion at 200 °C.**

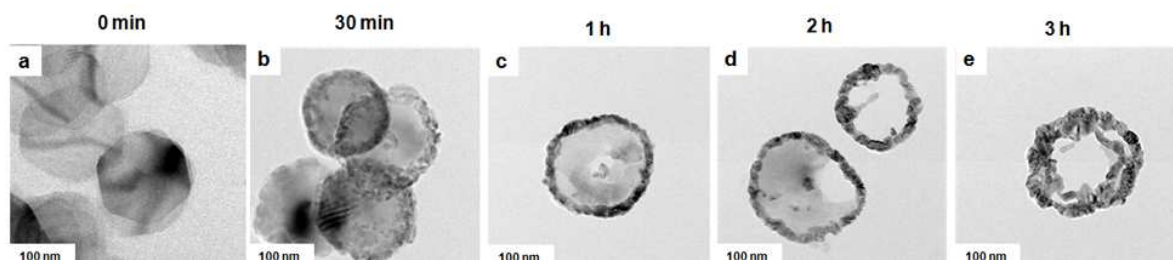

**Figure S2.** The molar ratio of reactant Cu ion to template ( $\text{TiS}_2$ ) is two. Aliquots were collected during the reaction for TEM analysis at several time points. (a) 0 min. (b) 30 min. (c) 1 h. d) 2 h. (e) 3 h.

**X-ray diffraction patterns of  $\text{TiS}_2\text{-Ag}_2\text{S}$  and  $\text{TiS}_2\text{-MnS}$  toroidal hetero-nanocrystals and CdS toroidal nanocrystals.**

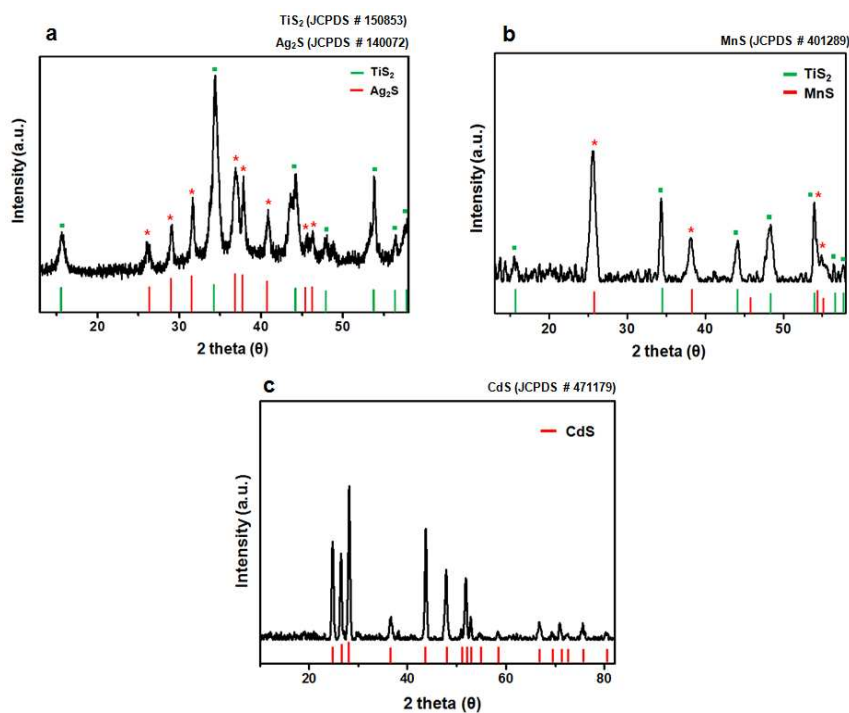

**Figure S3.** XRD patterns of (a)  $\text{TiS}_2\text{-Ag}_2\text{S}$  and (b)  $\text{TiS}_2\text{-MnS}$  toroidal hetero-nanocrystals and (c) CdS toroidal nanocrystals obtained from the reactions between  $\text{TiS}_2$  nanodisc and Ag ion, Mn ion and Cd ion.
